# Supplementary material for: A Chemical and Enzymatic Approach to Study Site-Specific Sumoylation
Source: PubMed Central journal article supplement (PMC4669148; doi:10.1371/journal.pone.0143810), 2015-12-03
Supplement: pone.0143810.s001.pdf [file pone.0143810.s001.pdf]

**Supplementary Table 1:** List of yeast strains used in this study.

| <b>Strain number</b> | <b>Genotype</b>                                                                                             | <b>Study</b>                           |
|----------------------|-------------------------------------------------------------------------------------------------------------|----------------------------------------|
| SCY249               | <i>MATa, ura3-52, leu2Δ1, trp1Δ63, his3Δ200, lys2ΔBgl, hom3-10, ade2Δ1, ade8, arg4Δ, sml1Δ::TRP1</i>        | Chen SH et al. J Biol Chem. 2010       |
| HZY2101              | <i>MATa, 6xHIS-3XFLAG-SMT3</i> , derived from SCY249 with 2 micron removed                                  | Albuquerque CP et al. PLoS Genet. 2013 |
| HZY2131              | Isogenic with RDKY6678 containing the GCR assay with 2 micron removed.                                      | Albuquerque CP et al. PLoS Genet. 2013 |
| HZY491               | <i>MATa, AOS1-6xHIS-3xHA::G418</i> , derived from HZY2101                                                   | This study                             |
| HZY2574              | <i>MAT alpha, mec1Δ::URA, 6xHIS-3XFLAG-SMT3</i> , derived from HZY2101                                      | This study                             |
| HZY3419              | <i>MATa, 6xHIS-3XFLAG-SMT3, aos1-K4R-6xHis-3XHA::G418</i> , derived from HZY2101                            | This study                             |
| HZY3422              | <i>MATa, 6xHIS-3XFLAG-SMT3, aos1-K4R, K7R-6xHIS-3XHA::G418</i> , derived from HZY2101 with 2 micron removed | This study                             |
| HZY3499              | <i>MATa, 6xHIS-3XFLAG-SMT3, uba2-K229R-6xHIS-3XHA::HIS</i> , derived from HZY2101                           | This study                             |

|         |                                                                                                                            |            |
|---------|----------------------------------------------------------------------------------------------------------------------------|------------|
| HZY3504 | MATa, 6xHIS-3XFLAG-SMT3, uba2-3KR(K167R, K168R, K172R)-6xHIS-3XHA::HIS, derived from HZY2101                               | This study |
| HZY3392 | MAT a, <i>smt3</i> -GG::G418, derived from HZY2131. The last three amino acid of Smt3 is removed to expose Gly-Gly repeat. | This study |
| HZY4247 | MAT a, <i>smt3</i> -I96R-GG::G418, derived from HZY2131                                                                    | This study |
| HZY4248 | MAT a, 6xHIS-3xFLAG- <i>smt3</i> -I96R-GG::G418, derived from HZY2101                                                      | This study |
